# Supplementary material
Source: publisher figshare collection journal article supplement (https://tandf.figshare.com/ndownloader/files/17427797)
Supplement: Supplementary file 1 [file 17427797]

**Interview Questions**

The interview guide included questions about preconceptions of volunteering, experiences of volunteering, and the impact of volunteering on wellbeing. Interview questions that were particularly relevant for this article focused on the experience of being a refugee resettlement volunteer, the impact of both positive and negative experiences on volunteers’ wellbeing, and the reactions of family, friends, and work colleagues to their volunteering. These questions are included below:

1. If I followed you through a typical ‘day’ volunteering, what would I see you doing? What would I hear? What experiences would I observe you having? (Patton, 2002). It’s like you’re taking a “verbal photo” for me since I can’t follow you around.
2. How has the experience of volunteering affected you?
3. How does volunteering contribute to your wellbeing?
4. Can you describe a specific incident, experience or moment of your voluntary activity when you really experienced that wellbeing?
5. What feelings do you associate with the experience? What thoughts stand out for you?
6. Can you describe a specific moment which was challenging or difficult? How did you handle this?
7. How do your family, friends or colleagues react to your volunteering?
